# Supplementary material
Source: PubMed Central journal article supplement (PMC5224928)
Supplement: NIHMS830644-supplement-308538R2_Acknowledgment_Permissions.pdf [file NIHMS830644-supplement-308538R2_Acknowledgment_Permissions.pdf]

## Circulation Research

---

**From:** Mattapally, Saidulu <smpalla@uab.edu>  
**Sent:** Sunday, October 16, 2016 12:56 PM  
**To:** circulation.research@circresearch.com  
**Cc:** Borovjagin, Anton V; Zhang, Jianyi  
**Subject:** CIRCRES/2016/308538R2: Request Manuscript Correction

Dear Sir/Madam,

This email regarding the manuscript CIRCRES/2016/308538R2. Here I am confirm (cite) my permission to be acknowledged in this manuscript.

Thank you

Regards  
saidulu

## Circulation Research

---

**From:** Labarge, Wesley C <[wlabarge@uab.edu](mailto:wlabarge@uab.edu)>  
**Sent:** Sunday, October 16, 2016 9:46 AM  
**To:** [circulation.research@circresearch.com](mailto:circulation.research@circresearch.com)  
**Cc:** Zhang, Jianyi; Borovjagin, Anton V  
**Subject:** Permission for Acknowledgement

Greetings,

My name is Wesley LaBarge. I give permission to be acknowledged and cited on this paper.

Thank you,

Wesley LaBarge

Graduate Research Assistant  
University of Alabama at Birmingham

**From:** "Borovjagin, Anton V" <[aborov@uab.edu](mailto:aborov@uab.edu)>  
**Date:** October 16, 2016 at 5:08:28 AM CDT  
**To:** "Mattapally, Saidulu" <[smpalla@uab.edu](mailto:smpalla@uab.edu)>, "Labarge, Wesley C" <[wlabarge@uab.edu](mailto:wlabarge@uab.edu)>  
**Subject: Fw: CIRCRES/2016/308538R2: Request Manuscript Correction**

Saidulu, Wesley,

You have been acknowledged in our review manuscript that is going to be accepted for publication in Circulation Research. (Please see the email from the journal below).

Could you please confirm (cite) your permission to be acknowledged in the manuscript by sending an email ASAP to: [circulation.research@circresearch.com](mailto:circulation.research@circresearch.com)
